# Supplementary material
Source: Springer Nature journal article supplement (https://www.springermedizin.de/resource/supplementary/12879_2008_664_MOESM6_ESM.pdf/9449458)
Supplement: MOESM6 [file 9449458]

**Table 4 – False negative cases.**

| <b>Pt.</b> | <b>BAL Culture</b> | <b>BAL Histology</b> | <b>Clinical Diagnosis</b>                              | <b>Human DNA (ng per reaction)</b> | <b>CT scan results and other clinical information</b>                                                                           |
|------------|--------------------|----------------------|--------------------------------------------------------|------------------------------------|---------------------------------------------------------------------------------------------------------------------------------|
| <b>8</b>   | <b>negative</b>    | <b>negative</b>      | <b>IPA</b>                                             | <b>0.23 from 1 BAL</b>             | <b>No evidence of IPA in BAL; patchy bilateral infiltrates; lung biopsy 1 week later confirmed IPA by culture and histology</b> |
| <b>9</b>   | <b>positive</b>    | <b>negative</b>      | <b>IPA<br/>DAH<br/><i>Staphylococcus pneumonia</i></b> | <b>33 and 72.5 from 2 BALs</b>     | <b>1 CFU <i>A. fumigatus</i> in BAL fluid; patchy nodular infiltrates on CT; on ambisome for 10 days prior to bronchoscopy</b>  |
| <b>10</b>  | <b>positive</b>    | <b>negative</b>      | <b>IPA<br/>Legionella<br/>CMV<br/>pneumonia</b>        | <b>10 to 218 from 4 BALs</b>       | <b>1 CFU <i>A. niger</i> in BAL with CT scan showing halo sign, IPA confirmed at autopsy</b>                                    |
